# Supplementary material for: Measurable residual disease assessment in apheresis product from multiple myeloma patients: association with biology, depth of response and survival.
Source: Research Square preprint supplement (doi:10.21203/rs.3.rs-8444748/v1), 2026-01-19
Supplement: Supplementary file 1 [file 1c804e5e24f6cb883432530c.docx]

**Table 1.** Characteristics at diagnosis according to aMRD status

|  | **aMRD+ve**  **(n=45)** | **aMRD-ve**  **(n=377)** | ***P* value** |
| --- | --- | --- | --- |
| **Age at ASCT, median (range)** | 60 (40-70) | 60 (30-72) | 0.720 |
| **Male, n (%)** | 27/45 (60.0) | 242/377 (64.2) | 0.580 |
| **ECOG PS ≤1** | 34/35 (97.1) | 37/320 (88.4) | 0.114 |
| **IgH isotype**  **IgG, n (%)**  **IgA, n (%)**  **LC only, n (%)** | 28/45 (62.2)  10/45 (22.2)  6/45 (13.3) | 214/377 (56.8)  76/377 (20.2)  78/377 (20.7) | 0.484  0.745  0.243 |
| **IgL isotype**  **Kappa, n (%)** | 26/45 (57.8) | 250/377 (66.3) | 0.255 |
| **Hb (g/dL), mean (±SD)** | 11.5 (±2.2) | 11.4 (±2.3) | 0.379 |
| **Calcium (mg/dL), mean (±SD)** | 10.1 (±1.1) | 9.9 (±1.6) | 0.271 |
| **CrCl (mg/dL), mean (±SD)** | 1.5 (±2.1) | 1.4 (±1.3) | 0.292 |
| **M component (g/dL), mean (±SD)** | 3.2 (±2.5) | 3.2 (±3.6) | 0.469 |
| **BJ proteinuria (mg/24), mean (±SD)** | 1.3 (±3.3) | 1.8 (±5.2) | 0.262 |
| **Lytic lesions, n (%)** | 29/41 (70.7) | 263/352 (74.7) | 0.581 |
| **Pure plasmacytoma, n (%)** | 0/39 (0.0) | 9/337 (2.4) | 0.302 |
| **PCs in BM (%), mean (±SD)** | 41.7 (±27.8) | 34.4 (±25.0) | 0.062 |
| **Albumin (g/dL), mean (±SD)** | 3.6 (±0.8) | 3.8 (±0.9) | 0.201 |
| **β2 microglobulin (mg/L), mean (±SD)** | 4.2 (±4.1) | 4.7 (±3.7) | 0.253 |
| **Elevated LDH, n (%)** | 7/29 (24.1) | 62/267 (23.2) | 0.912 |
| **HRCA, n (%)** | 6/42 (14.3) | 64/343 (18.7) | 0.488 |
| **ISS, n (%)**  **I**  **II**  **III** | 18/44 (40.9)  13/44 (29.5)  13/44 (29.5) | 144/357 (40.3)  117/357 (32.8)  96/357 (26.9) | 0.760  0.582  0.919 |
| **R-ISS, n (%)**  **I**  **II**  **III** | 9/32 (28.1)  20/32 (62.5)  3/32 (9.4) | 82/305 (26.9)  173/305 (56.7)  50/305 (16.4) | 0.811  0.530  0.300 |

Captions: ASCT: autologous stem cell transplantation; aMRD: measurable residual disease in apheresis product; BJ: Bence-Jones; BM: bone marrow; CrCl: creatinine clearance; ECOG: Eastern Cooperative Oncology Group; Hb: hemoglobin; HRCA: high-risk chromosomal abnormalities; ISS: International Staging System; LC: light chain; LDH: lactate dehydrogenase; PC: Plasma cell; PS: performance status; R-ISS: Revised International Staging System; SD: standard derivation; +ve: positive; -ve: negative.
