# Supplementary material for: Measurable residual disease assessment in apheresis product from multiple myeloma patients: association with biology, depth of response and survival.
Source: Research Square preprint supplement (doi:10.21203/rs.3.rs-8444748/v1), 2026-01-19
Supplement: Supplementary file 1 [file 29356621427da556607205e8.pdf]

**Supplementary Table 1.** Univariate model to predict progression-free survival.

|                                                                               | <b>HR, [95% CI]</b> | <b>P value</b>   |
|-------------------------------------------------------------------------------|---------------------|------------------|
| <b>aMRD+ve/bmMRD+ve</b>                                                       | 2.31 [1.44-3.68]    | <b>&lt;0.001</b> |
| <b>aMRD-ve/bmMRD+ve</b>                                                       | 1.31 [0.94-1.81]    | 0.109            |
| <b>ECOG PS ≥2</b>                                                             | 1.70 [1.11-2.60]    | <b>0.014</b>     |
| <b>Hemoglobin ≤10 g/dL</b>                                                    | 1.49 [1.12-2.00]    | <b>0.007</b>     |
| <b>ClCr ≥2 mg/dL and/or<br/>GF ≤40 ml/min</b>                                 | 1.53 [1.08-2.17]    | <b>0.017</b>     |
| <b>Calcium ≥11 mg/dL</b>                                                      | 1.70 [1.16-2.49]    | <b>0.007</b>     |
| <b>Soft tissue plasmacytoma</b>                                               | 0.68 [0.25-1.84]    | 0.451            |
| <b>High-risk cytogenetic</b>                                                  | 1.62 [1.16-2.26]    | <b>0.005</b>     |
| <b>PCs in BM ≥50%</b>                                                         | 1.22 [0.90-1.66]    | 0.218            |
| <b>LDH elevated</b>                                                           | 1.77 [1.25-2.52]    | <b>0.001</b>     |
| <b>ISS II-III</b>                                                             | 1.75 [1.33-2.32]    | <b>&lt;0.001</b> |
| <b>Not induction treatment<br/>with PI plus IMiD<br/>plus/minus anti-CD38</b> | 1.99 [1.54-2.57]    | <b>&lt;0.001</b> |
| <b>ASCT in 1<sup>st</sup> line</b>                                            | 0.90 [0.58-1.29]    | 0.461            |
| <b>Melphalan as conditioning</b>                                              | 0.90 [0.37-2.19]    | 0.916            |
| <b>Not receiving<br/>maintenance therapy</b>                                  | 1.91 [1.46-2.50]    | <b>&lt;0.001</b> |
| <b>Not receiving<br/>consolidation therapy</b>                                | 1.20 [0.89-1.62]    | 0.242            |

Abbreviations: ASCT: autologous stem cell transplantation; aMRD: minimal residual disease in apheresis product; BM: bone marrow; bmMRD: minimal residual disease in bone marrow; CI: confidence interval; ClCr: clearance creatinine; ECOG: Eastern Cooperative Oncology Group; GF: glomerular filtrate; IMiD: immunomodulator; HR: hazard ratio; ISS: International Staging System; LDH: lactate dehydrogenase; PC: plasma cell; PI: proteasome inhibitor; PS: performance status; -ve: negative; +ve: positive.

\*High-risk cytogenetic was defined as the detection of t(4;14) and/or t(14;16) and/or del(17p).

**Supplementary Table 2.** Univariate model to predict early relapse/early death due to myeloma.

|                                                                                 | <b>OR, [95% CI]</b> | <b>P value</b>   |
|---------------------------------------------------------------------------------|---------------------|------------------|
| <b>aMRD+ve/bmMRD+ve</b>                                                         | 4.84 [1.70-13.76]   | <b>0.003</b>     |
| <b>aMRD-ve/bmMRD+ve</b>                                                         | 1.87 [0.80-4.38]    | 0.150            |
| <b>ECOG PS <math>\geq 2</math></b>                                              | 2.56 [1.06-6.17]    | <b>0.036</b>     |
| <b>Hemoglobin <math>\leq 10</math> g/dL</b>                                     | 1.40 [0.73-2.67]    | 0.315            |
| <b>ClCr <math>\geq 2</math> mg/dL and/or<br/>GF <math>\leq 40</math> ml/min</b> | 1.76 [0.85-3.66]    | 0.129            |
| <b>Calcium <math>\geq 11</math> mg/dL</b>                                       | 1.71 [0.75-3.90]    | 0.203            |
| <b>Soft tissue plasmacytoma</b>                                                 | 0.99 [0.12-8.37]    | 0.990            |
| <b>High-risk cytogenetic</b>                                                    | 1.11 [0.51-2.44]    | 0.792            |
| <b>PCs in BM <math>\geq 50\%</math></b>                                         | 1.26 [0.62-2.54]    | 0.530            |
| <b>LDH elevated</b>                                                             | 3.16 [1.48-6.73]    | <b>0.003</b>     |
| <b>ISS II-III</b>                                                               | 2.00 [1.04-3.86]    | <b>0.038</b>     |
| <b>Not induction treatment<br/>with PI plus IMiD<br/>plus/minus anti-CD38</b>   | 2.75 [1.52-4.97]    | <b>&lt;0.001</b> |
| <b>ASCT <math>&gt;1^{\text{st}}</math> line</b>                                 | 1.72 [0.51-5.84]    | 0.386            |
| <b>Melphalan as conditioning</b>                                                | 1.59 [0.47-5.44]    | 0.458            |
| <b>Not receiving<br/>maintenance therapy</b>                                    | 3.23 [1.77-5.92]    | <b>&lt;0.001</b> |
| <b>Not receiving<br/>consolidation therapy</b>                                  | 1.70 [0.84-3.43]    | 0.143            |

Abbreviations: ASCT: autologous stem cell transplantation; aMRD: minimal residual disease in apheresis product; BM: bone marrow; bmMRD: minimal residual disease in bone marrow; CI: confidence interval; ClCr: clearance creatinine; ECOG: Eastern Cooperative Oncology Group; GF: glomerular filtrate; IMiD: immunomodulator; ISS: International Staging System; LDH: lactate dehydrogenase; OR: odds ratio; PC: plasma cell; PI: proteasome inhibitor; PS: performance status; -ve: negative; +ve: positive.

\*High-risk cytogenetic was defined as the detection of t(4;14) and/or t(14;16) and/or del(17p).

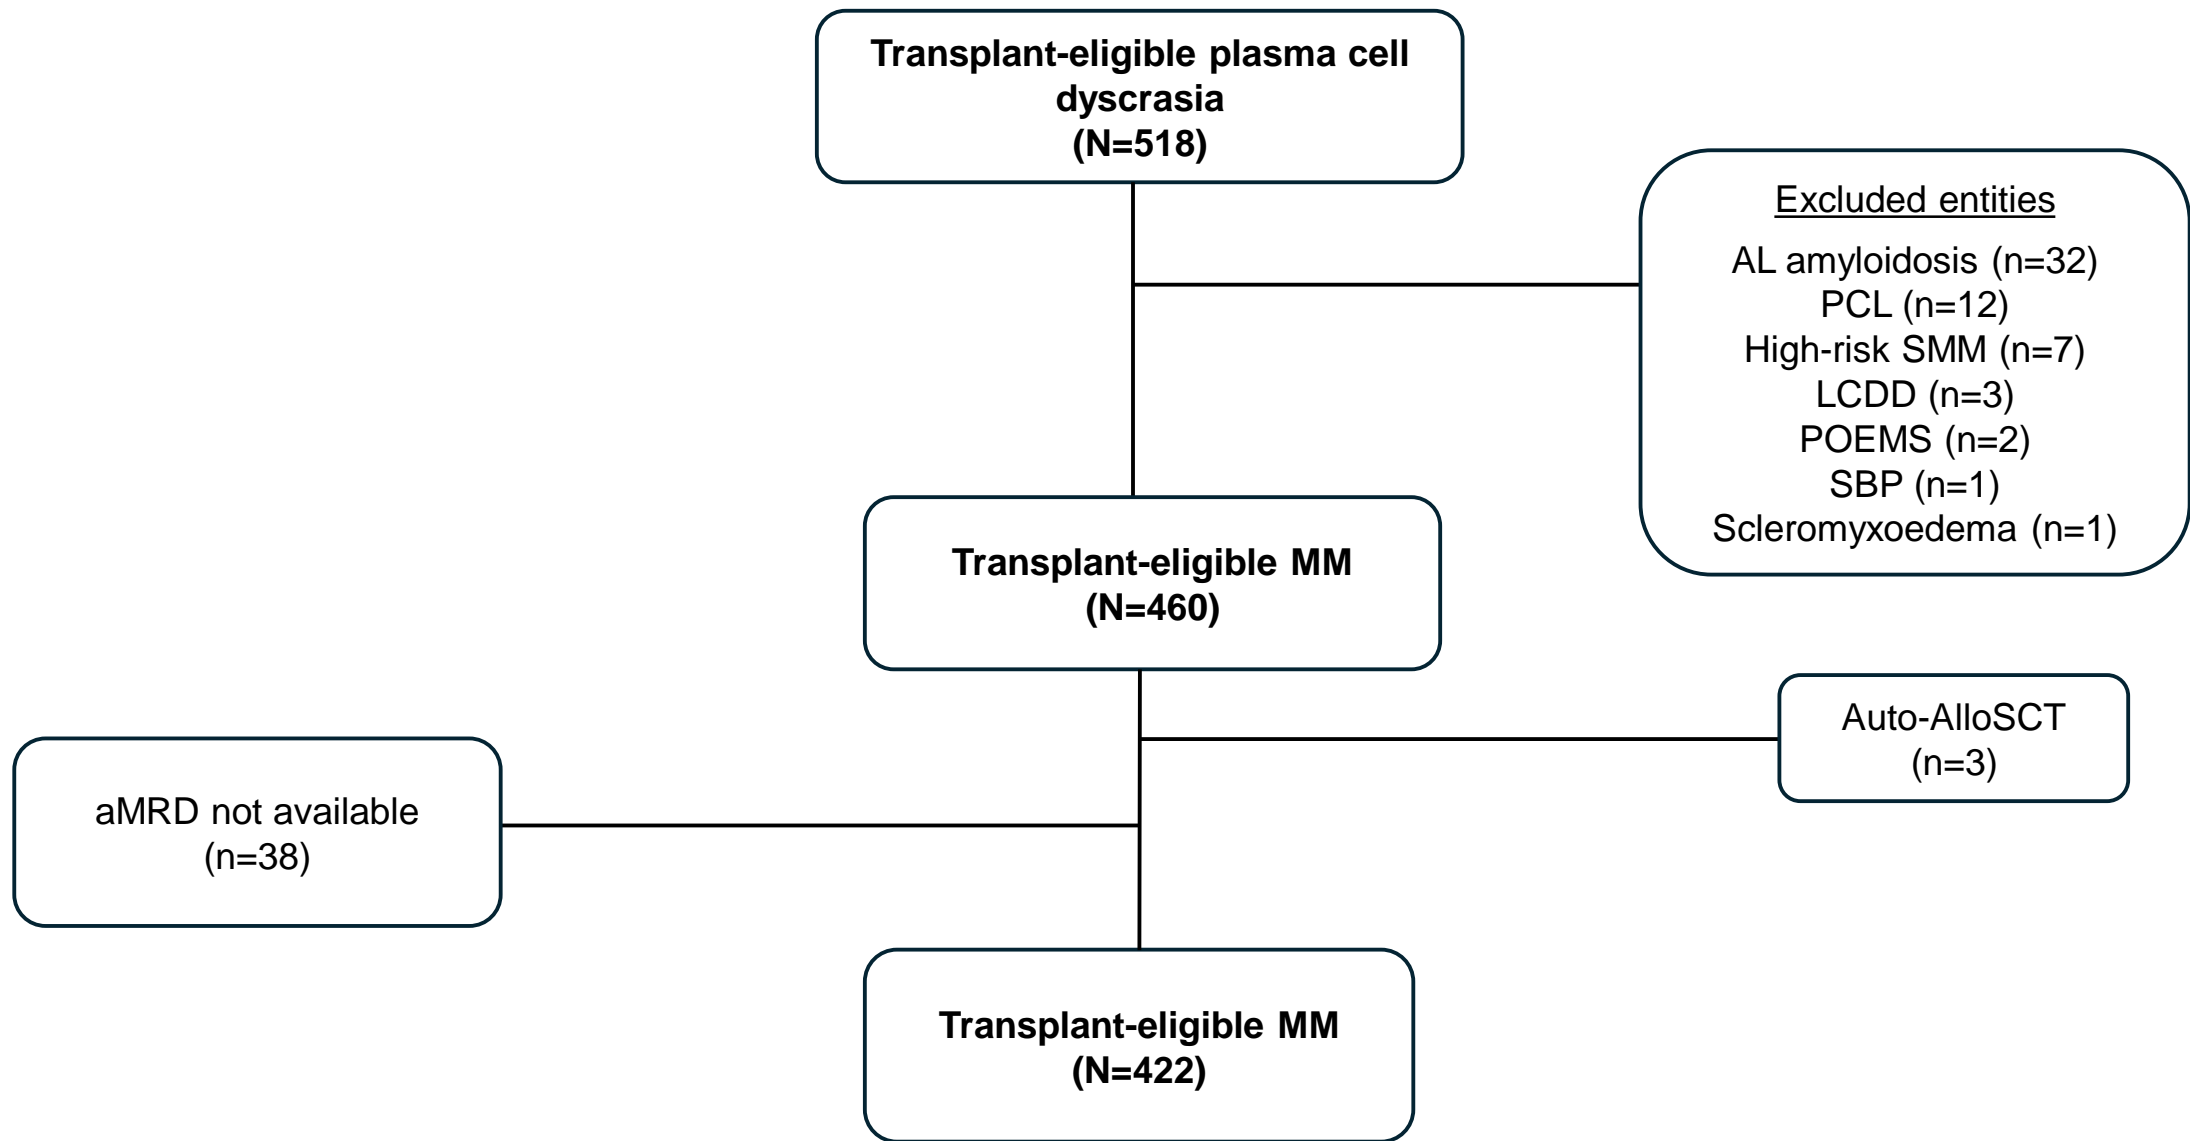

**Supplementary Figure 1.** CONSORT diagram.

**Captions:** Allo: allogeneic; Auto: autologous; aMRD: minimal residual disease in apheresis product; LCDD: Light chain deposition disease; MGUS: Monoclonal gammopathy of undetermined significance; MM: Multiple myeloma; PCL: Plasma cell leukemia; SCT: Stem cell transplantation; SBP: Solitary bone plasmacytoma; SMM: Smoldering multiple myeloma;

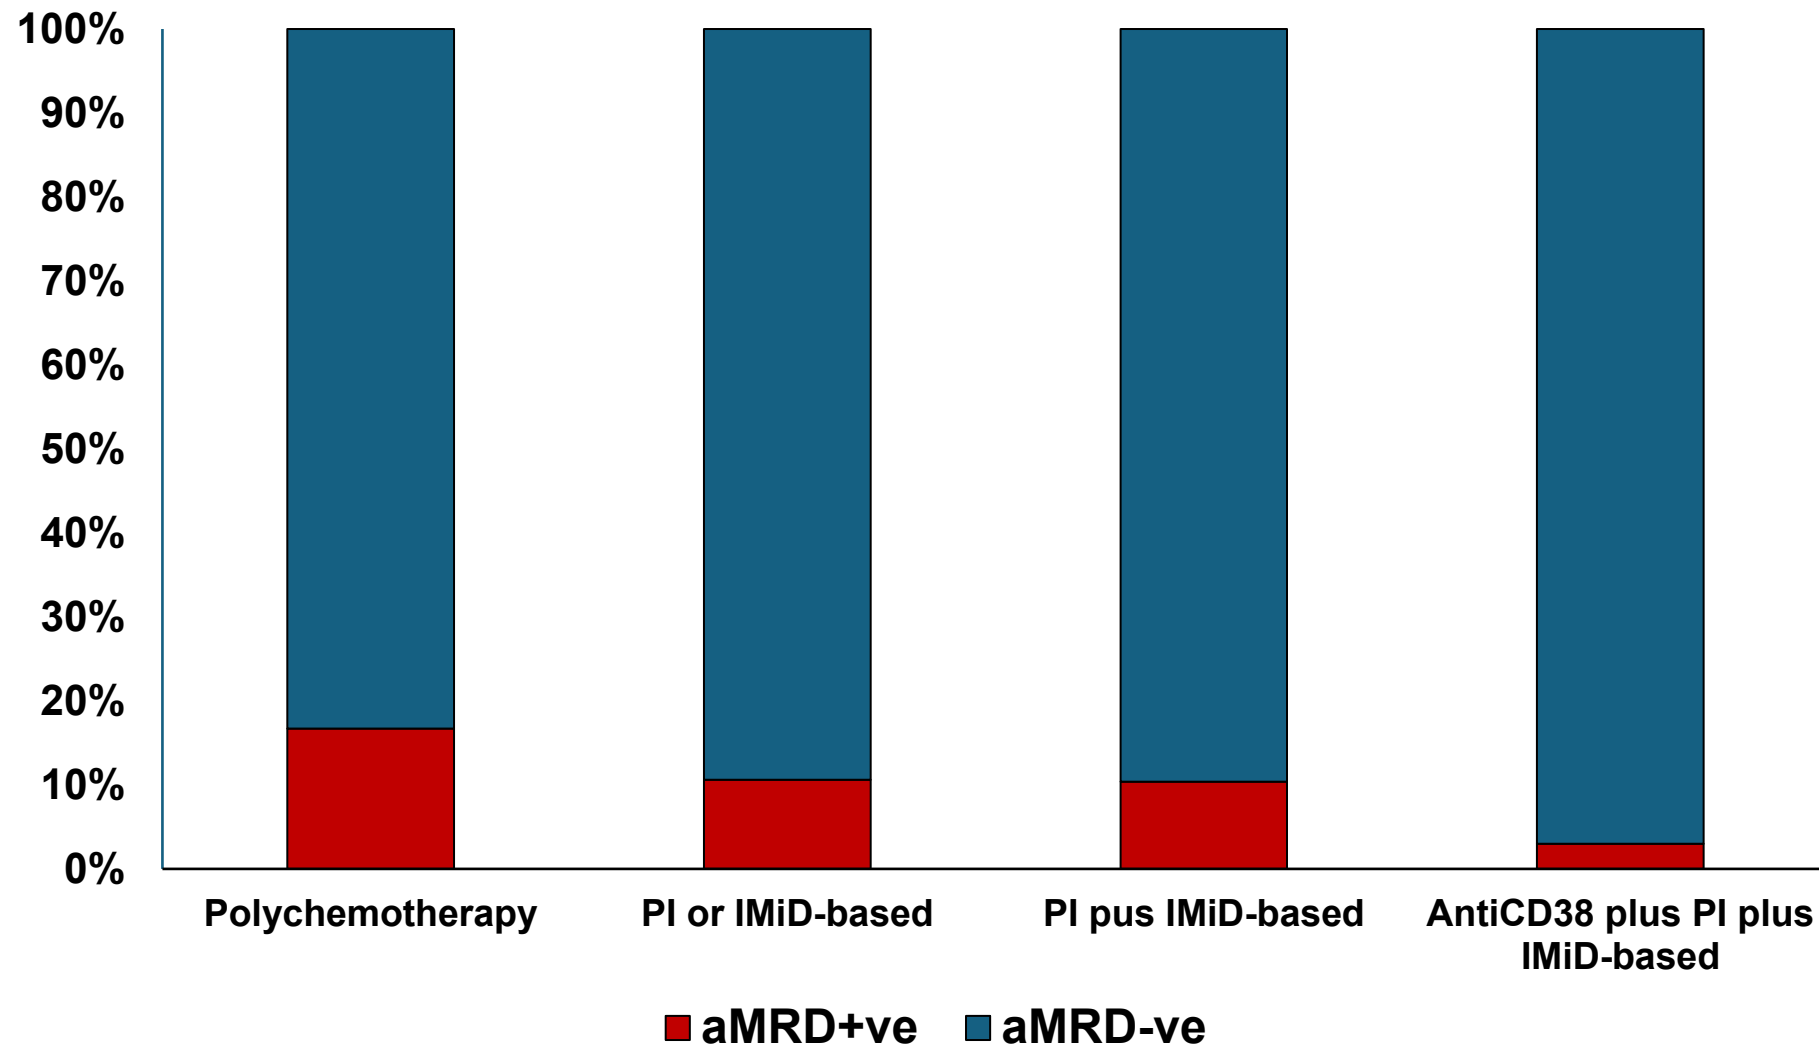

**Supplementary Figure 2.** Measurable residual disease in apheresis product according to induction treatment.

Captions: aMRD: Measurable residual disease in apheresis product; PI: proteasome inhibitor; IMiD: immunomodulator; +ve: positive; -ve: negative.

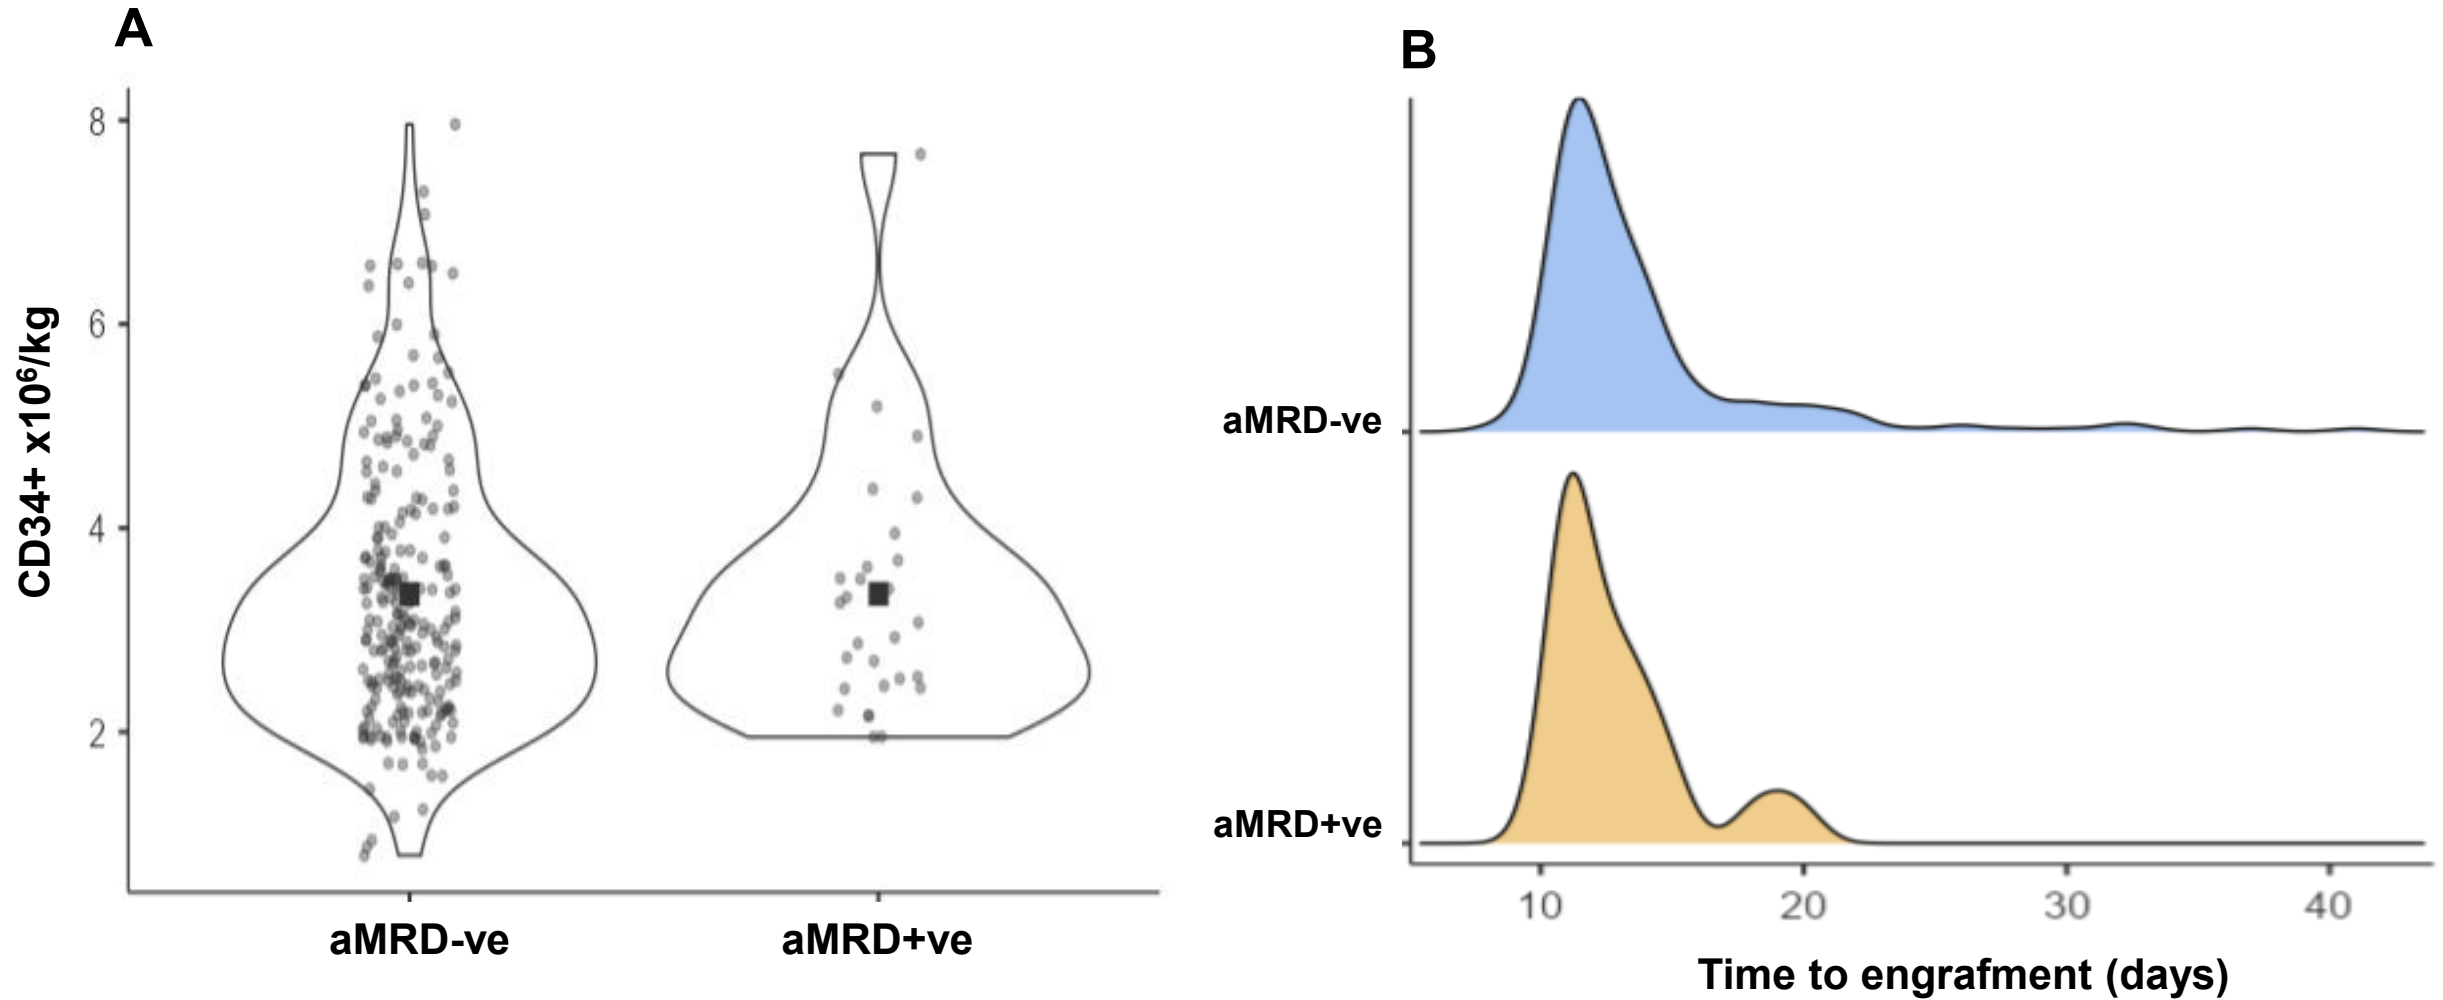

**Supplementary Figure 3.** Engraftment outcomes: A) CD34+ cell dose infused; B) Time to engraftment.

Captions: aMRD: measurable residual disease in apheresis product; +ve: positive; -ve: negative.

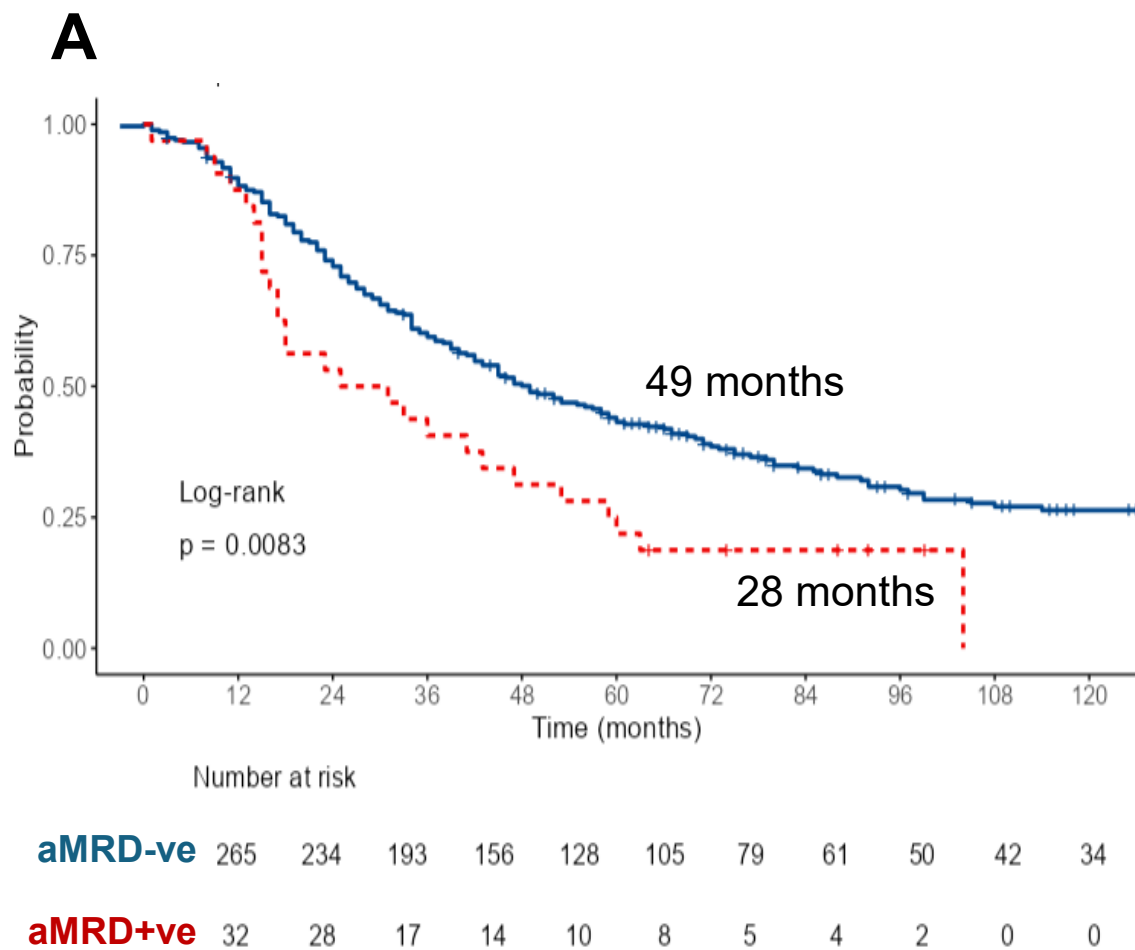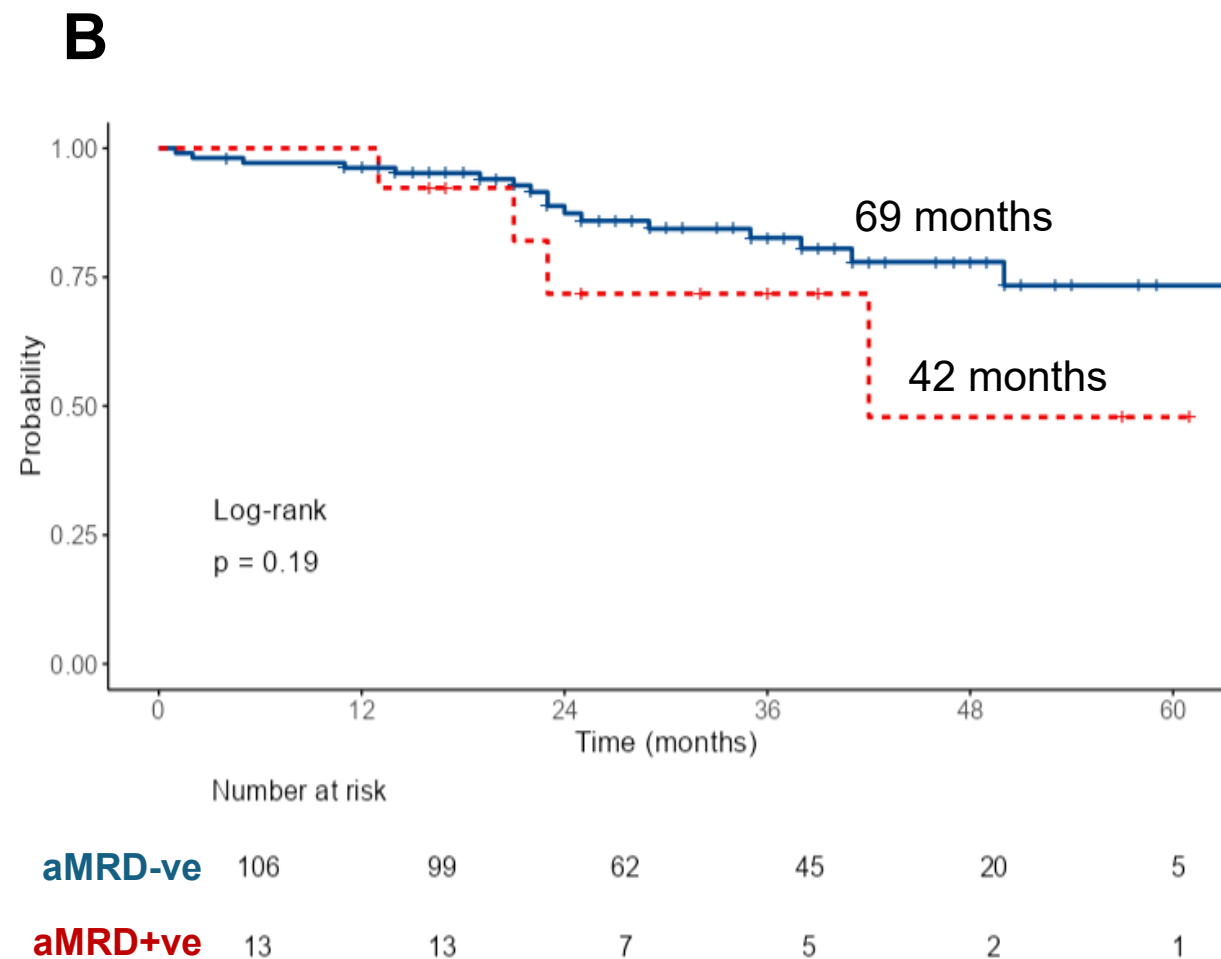

**Supplementary Figure 4.** Progression-free survival according aMRD and sensitivity threshold: A) Sensitivity  $10^{-4}$ ; and B) Sensitivity  $10^{-5}$ .

Captions: aMRD: measurable residual disease in apheresis product; +ve: positive; -ve: negative

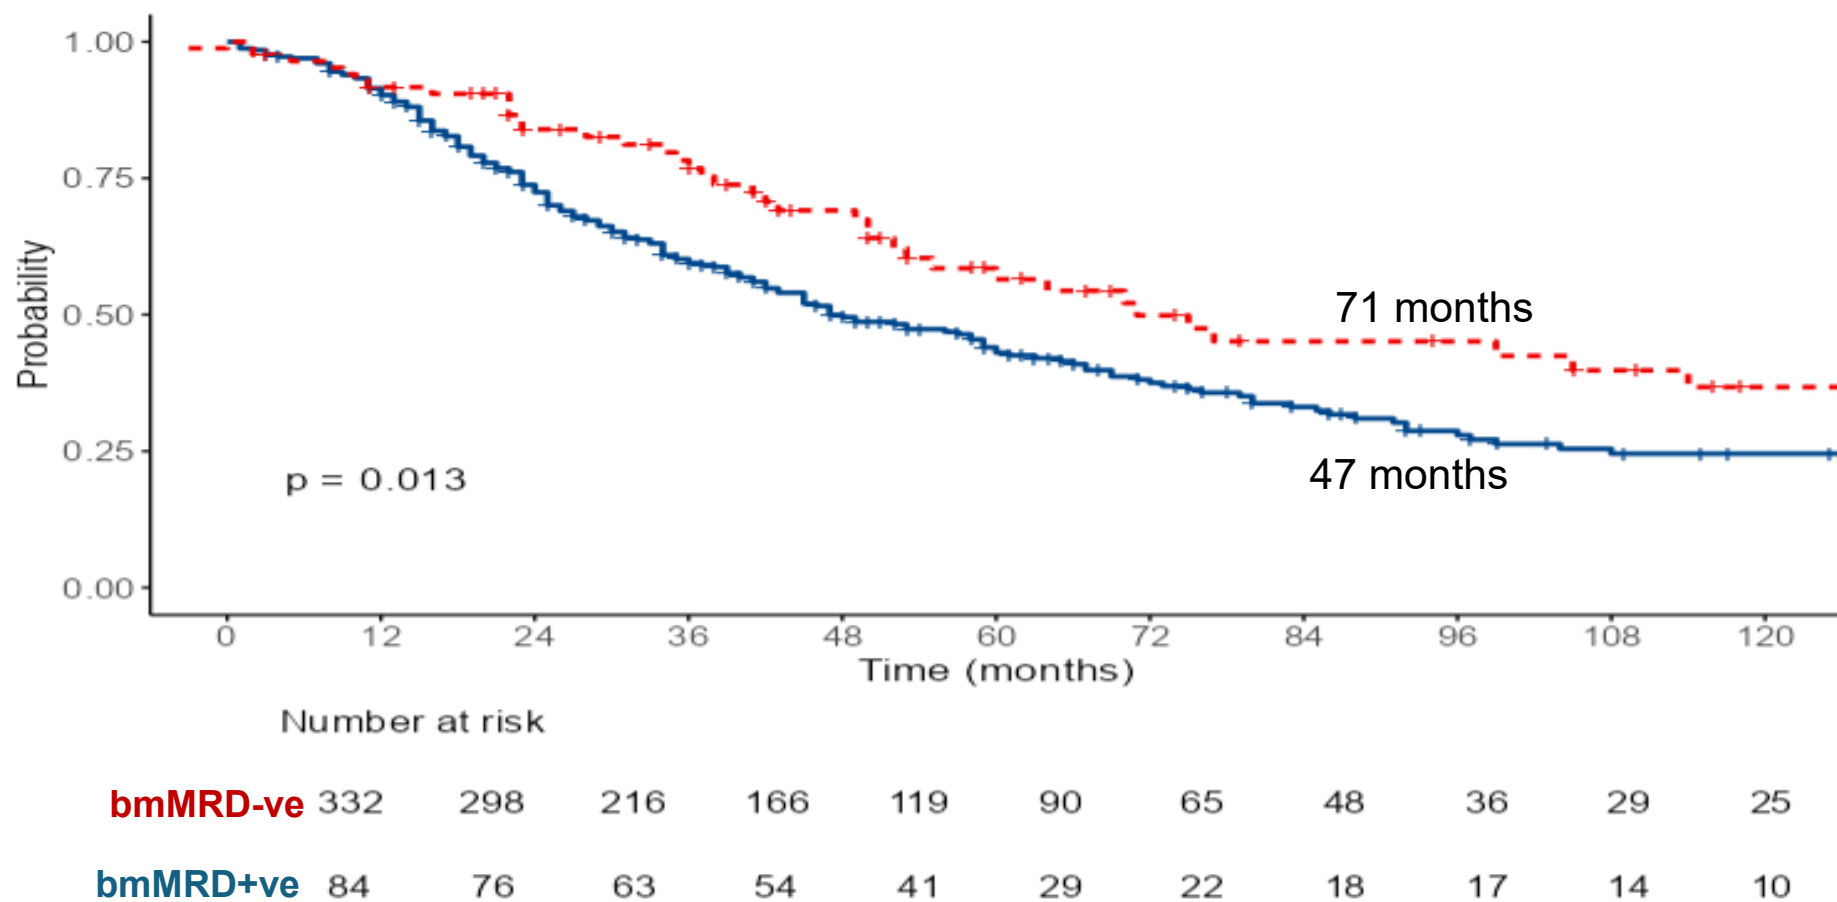

**Supplementary Figure 5.** Progression-free survival according minimal residual disease in bone marrow prior to ASCT

Captions: bmMRD: minimal residual disease in bone marrow; +ve: positive; -ve: negative.

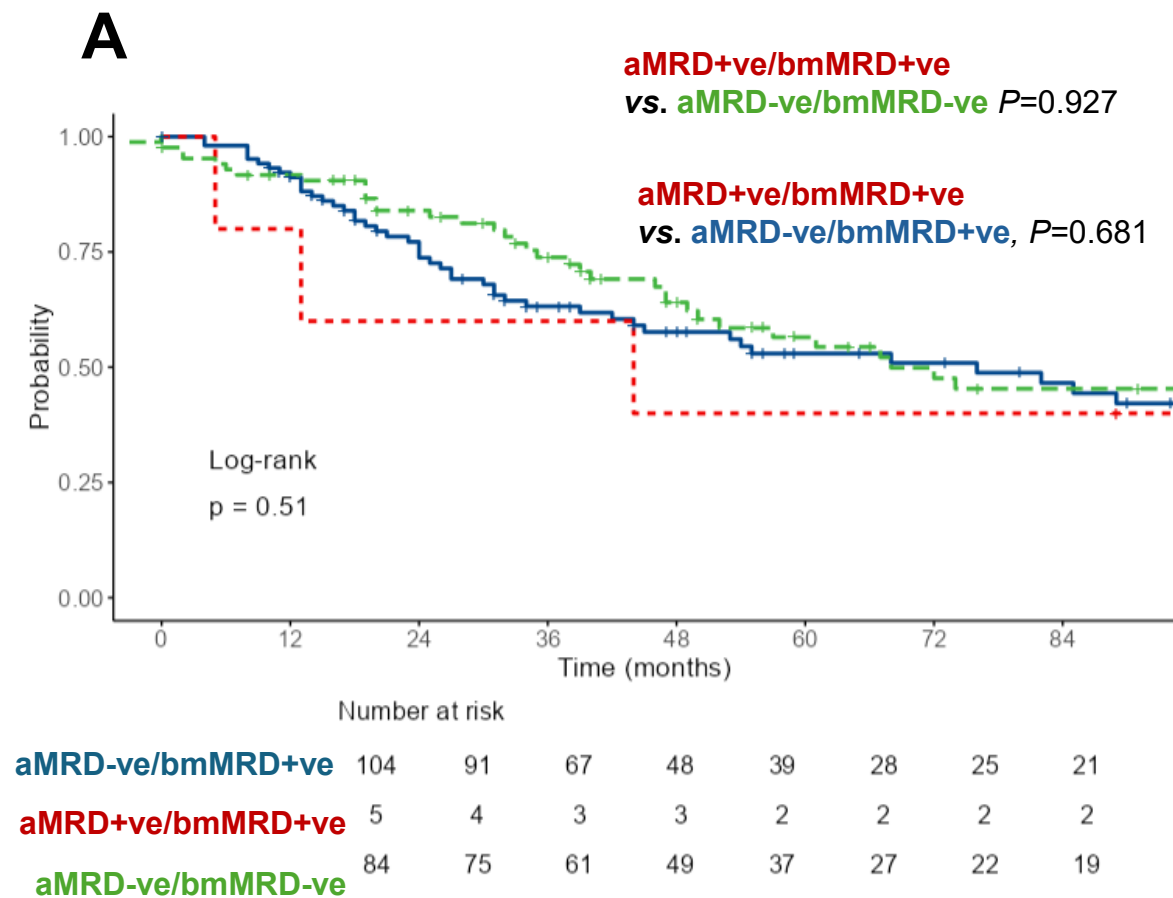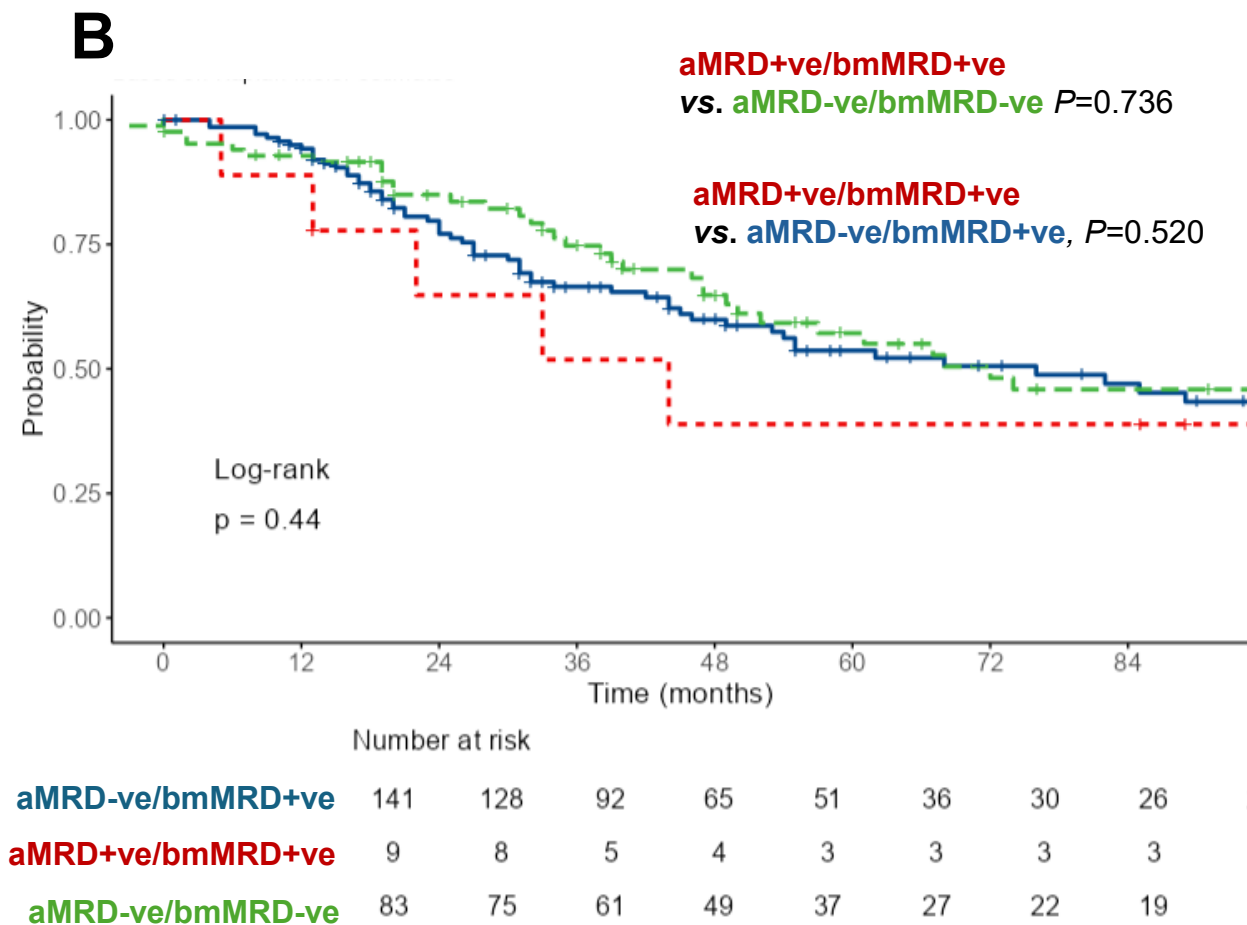

**Supplementary figure 6.** Progression-free survival in patients who achieved bmMRD-ve: A) At day 100 after ASCT; and B) During follow-up

Captions: ASCT: autologous stem cell transplantation; aMRD: measurable residual disease in apheresis product; bmMRD: measurable residual disease in bone marrow; +ve: positive; -ve: negative. \*\*\*Landmark: 100 days after ASCT.



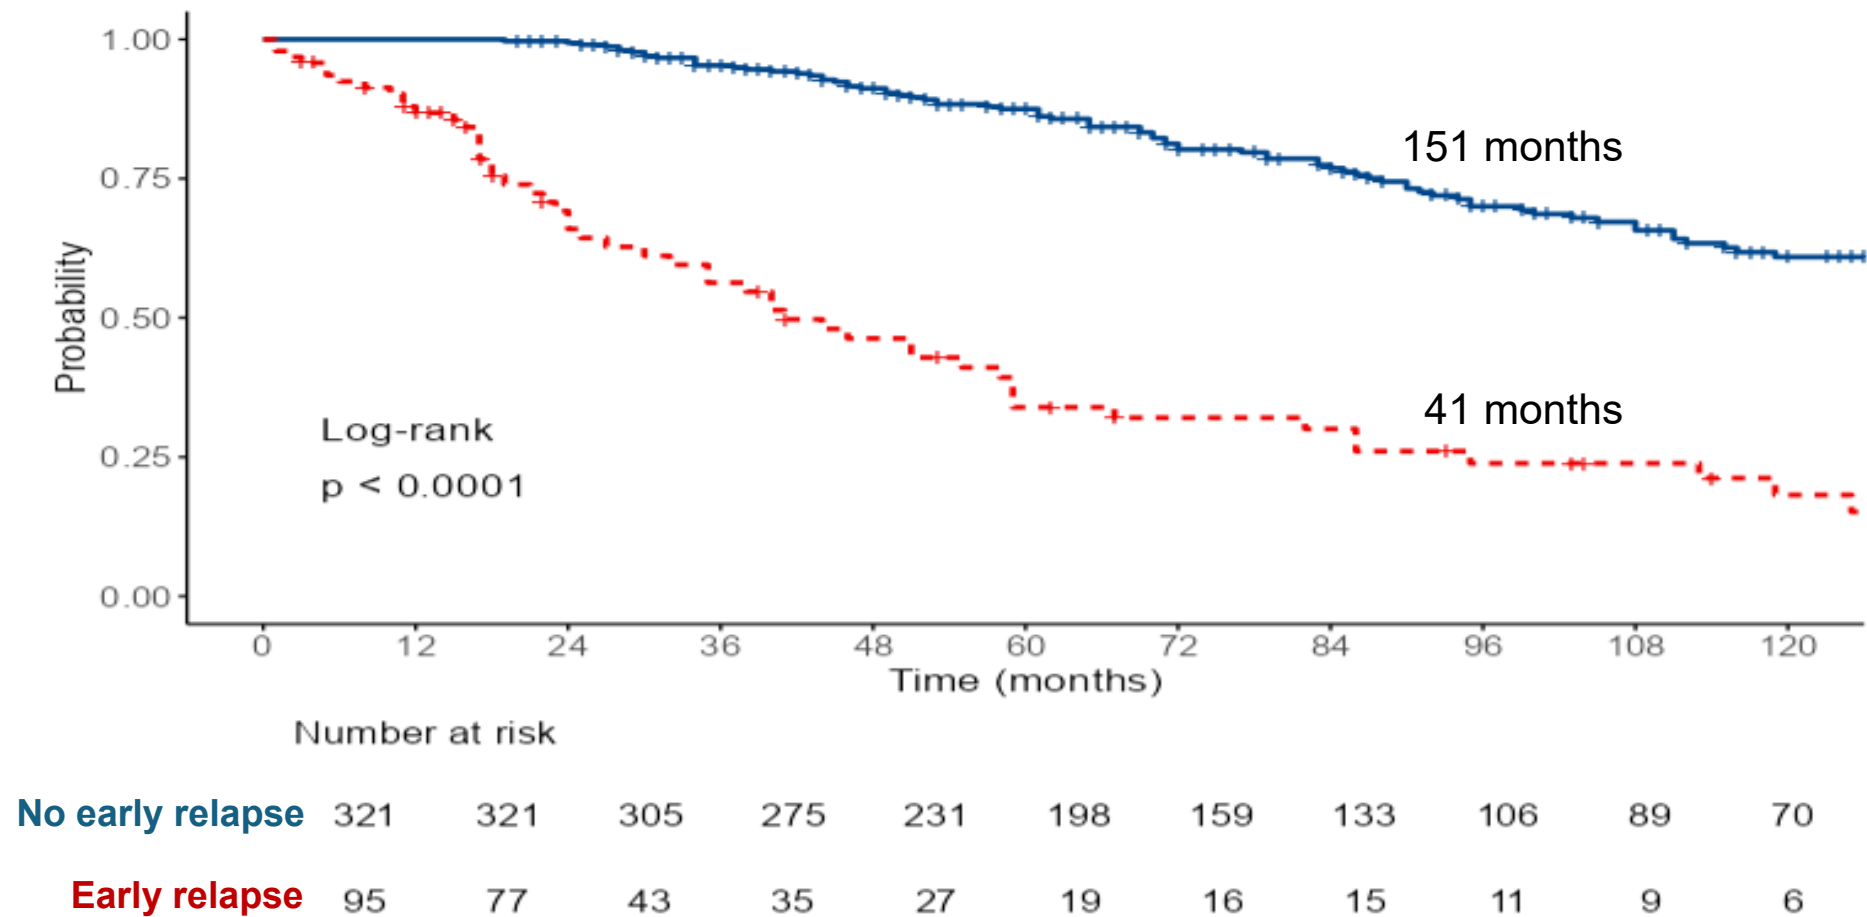

**Supplementary Figure 7.** Overall survival according to early relapse after ASCT

Captions: ASCT: autologous stem cell transplantation.
