# Supplementary material for: Measurable residual disease assessment in apheresis product from multiple myeloma patients: association with biology, depth of response and survival.
Source: Research Square preprint supplement (doi:10.21203/rs.3.rs-8444748/v1), 2026-01-19
Supplement: Supplementary file 2 [file 42c93112b13c42877bdc1e11.docx]

|  | **aMRD+ve**  **(n=45)**  **n (%)** | **aMRD-ve**  **(n=377)**  **n (%)** | ***P* value** |
| --- | --- | --- | --- |
| **Induction therapy** | | | |
| **PIs + IMiDs +/- anti-CD38 MoAb based schemes**  (DVRd, DVTd, VRd, VTd…) | 27 (60.0) | 256 (67.9) | 0.286 |
| **PIs based schemes**  (VCd, Vd…) | 9 (20.0) | 65 (17.2) | 0.646 |
| **IMiDs based schemes**  (TCd, Td, RCd, Rd…) | 0 (0.0) | 11 (3.0) | 0.246 |
| **Polychemotherapy** | 9 (20.0) | 45 (11.9) | 0.126 |
| **ASCT** | | | |
| **1st Line** | **37 (82.8)** | **346 (90.3)** | **0.036** |
| **Conditioning**  **MEL200**  **MEL140**  **BUMEL** | 43 (95.6)  2 (4.4)  0 (0.0) | 339 (91.8)  28 (7.5)  10 (2.7) | 0.223  0.462  0.269 |
| **Post-ASCT therapy** | | | |
| **Consolidation***  **2nd ASCT** | 16 (35.5)  2 (4.4) | 110 (29.2)  25 (6.6) | 0.443  0.571 |
| **Maintenance**  **R** | 32 (71.1)  21/32 (65.6) | 267 (70.8)  185/267 (69.3) | 0.705  0.628 |
| **Consolidation plus maintenance** | 11 (24.4) | 92 (24.4) | 0.904 |

**Table 3**. Induction, consolidation and maintenance according to aMRD detection.

Captions: A: doxorrubicine; ASCT: autologous stem cell transplantation; aMRD: minimal residual disease in apheresis product; BUMEL: busulphan plus melphalan; C: cyclophosphamide; D: daratumumab; d: dexamethasone; IMIDs: immunomodulators; MEL: melphalan; MoAb: monoclonal antibody; R: lenalidomide; T: thalidomide; V: bortezomib; +ve: positive; -ve: negative

*Consolidation: most patients received the same induction regimen, except for patients that underwent 2nd ASCT.
