# Supplementary material for: Measurable residual disease assessment in apheresis product from multiple myeloma patients: association with biology, depth of response and survival.
Source: Research Square preprint supplement (doi:10.21203/rs.3.rs-8444748/v1), 2026-01-19
Supplement: Supplementary file 3 [file d2f9cbb12f798b8400475fd4.docx]

**Table 2.** Cytogenetic abnormalities according to aMRD status.

|  | **aMRD+ve**  **n (%)** | **aMRD-ve**  **n (%)** | ***P* value** |
| --- | --- | --- | --- |
| **t(11;14)**  **t(4;14)**  **t(14;16)**  **Del(17p)**  **Gain(1q)**  **Del(1p)** | **12/43 (27.9)**  4/45 (8.9)  0/43 (0.0)  4/43 (9.3)  8/15 (53.3)  0/15 (0.0) | **46/345 (13.3)**  35/363 (9.6)  7/358 (2.0)  28/345 (8.1)  60/178 (33.7)  15/177 (8.5) | **0.011**  0.871  0.355  0.790  0.126  0.240 |

Captions: aMRD: measurable residual disease in apheresis product; +ve: positive; -ve: negative.
